# Supplementary material
Source: ML conference proceedings conference paper supplement (https://openreview.net/forum?id=oSQiao9GqB)
Supplement: supplementary_material [file attachment]

# LLAVA-NEXT-INTERLEAVE: TACKLING MULTI-IMAGE, VIDEO, AND 3D IN LARGE MULTIMODAL MODELS

**Anonymous authors**

Paper under double-blind review

## A DATA STATISTICS

The detailed data statistics of M4-Instruct is shown in Table 3.

The detailed data statistics of LLaVA-Interleave Bench is shown in Table 4.

## B ABLATION STUDY

### B.1 POOL VS NOT POOL VISION TOKENS FOR VIDEO TASKS.

Similar to LLaVA-NEXT-Video, we adopt a "Pooling to 1/4" strategy for which we pool the width and height of feature maps to 1/2 therefore reducing the number of tokens to 1/4. We study the impact of image token pooling. We train and infer our model under two settings: pooling to 1/4 and not pooling with ShareGPTVideo-Caption+QA(255K) data. Pooling to a 1/4 setting is similar to LLaVA-NEXT-Video, which uses the pooling technique to trade-off between the number of image tokens and the number of frames. In our experiment, we find that not pooling yields better performance under similar #image tokens. During training, we sample 10 frames for videos. In this table, we also observe that adding more frames (from 10 to 16) during inference improves performance.

### B.2 IMPACT OF VIDEO DPO TRAINING ON OTHER TASKS.

In Table 2, we compare the results of doing video DPO on other tasks. Though DPO significantly improves the video performance as shown in Table ??, it slightly impacts the performance of other tasks.

Table 1: Ablation to compare pooling and not pooling.

| Training    | Inference   | #frames | # Image tokens    | Act              | Avg         | VDD         | VideoChatGPT |             |             |             |             |
|-------------|-------------|---------|-------------------|------------------|-------------|-------------|--------------|-------------|-------------|-------------|-------------|
|             |             |         |                   |                  |             |             | CI           | DO          | CU          | TU          | CO          |
| Pooling 1/4 | Pooling 1/4 | 40      | 40x729x1/4=10x729 | 52.8/3.53        | 3.35        | 3.38        | 3.46         | 3.25        | 3.87        | 2.59        | 3.57        |
| Pooling 1/4 | Pooling 1/4 | 64      | 64x729x1/4=16x729 | 52.7/3.53        | 3.33        | 3.38        | 3.45         | 3.23        | 3.86        | 2.49        | 3.55        |
| Not Pooling | Not Pooling | 10      | 10x729            | 52.9/3.48        | 3.38        | 3.46        | 3.43         | 3.26        | 3.85        | 2.64        | 3.61        |
| Not Pooling | Not Pooling | 16      | 16x729            | <b>54.4/3.51</b> | <b>3.41</b> | <b>3.46</b> | <b>3.48</b>  | <b>3.28</b> | <b>3.87</b> | <b>2.74</b> | <b>3.62</b> |

Table 2: Ablation on the impact of video dpo on the performance of other tasks. QB: Q-Bench, Act: ActivityNet-QA, MVB: MVBench, VDD: Video Detailed Description, MME\*: Throughout our paper, we convert MME’s score to accuracy by summing up the perception and cognition scores and dividing 2800, SQA: Scienceqa-IMG.

| Setting          | Multi-image |       |      |       | Multi-view | Single-image |         |        |      |      |      |
|------------------|-------------|-------|------|-------|------------|--------------|---------|--------|------|------|------|
|                  | Mantis      | BLINK | QB   | NLVR2 | ScanQA     | AI2D         | ChartQA | DocVQA | MME* | POPE | SQA  |
| Before Video-DPO | 62.7        | 52.7  | 73   | 89.1  | 32.2       | 73.9         | 67.2    | 75.7   | 63.5 | 85.4 | 72.6 |
| After Video-DPO  | 60.8        | 51.7  | 86.8 | 87.7  | 25.5       | 72.2         | 56.1    | 73.1   | 62.6 | 86.6 | 71.7 |

Table 3: M4-Instruct detailed datasets.

| Task                                 | Dataset                                      | Scenario         | # Samples |
|--------------------------------------|----------------------------------------------|------------------|-----------|
| <b>Multi-image Scenarios</b>         |                                              |                  |           |
| Spot the Difference(42.6K)           | Real-world Difference                        | Realistic        | 6.7K      |
|                                      | Synthetic Difference                         | Synthetic        | 7.0K      |
|                                      | Spot-the-Diff                                | Surveillance     | 10.8K     |
|                                      | Birds-to-Words                               | Birds            | 14.2K     |
|                                      | CLEVR-Change                                 | Solids           | 3.9K      |
| Image Edit Instruction(67.7K)        | HQ-Edit                                      | Synthetic        | 50K       |
|                                      | MagicBrush                                   | Realistic        | 14.2K     |
|                                      | IEEdit                                       | Realistic        | 3.5K      |
| Visual Story Telling(67.5K)          | AESOP                                        | Cartoon          | 6.9K      |
|                                      | FlintstonesSV                                | Cartoon          | 22.3K     |
|                                      | PororoSV                                     | Cartoon          | 12.3K     |
|                                      | VIST                                         | Realistic        | 26K       |
| Text-rich VQA(21.3K)                 | WebQA                                        | Webpage          | 9.3K      |
|                                      | TQA                                          | Textbook         | 8.2K      |
|                                      | OCR-VQA                                      | OCR              | 1.9K      |
|                                      | DocVQA                                       | Document         | 1.9K      |
| Multi-image VQA(153.5K)              | NLVR2                                        | Realistic        | 86.4K     |
|                                      | MIT-States_StateCoherence                    | General          | 1.9K      |
|                                      | MIT-States_PropertyCoherence                 | General          | 1.9K      |
|                                      | RecipeQA_ImageCoherence                      | Recipe           | 8.7K      |
|                                      | VISION                                       | Industrial       | 9.9K      |
|                                      | Multi-VQA                                    | General          | 5K        |
|                                      | IconQA                                       | General          | 34.6K     |
| Low-level Comparison(65.9K)          | Coinstruct                                   | Low-level        | 50K       |
|                                      | Dreamsim                                     | Low-level        | 15.9K     |
| Image-caption Comprehension (41.8K)  | ImageCoDe                                    | General          | 16.6K     |
|                                      | Contrast-Caption                             | General          | 25.2K     |
| Daily Scenarios (5.7K)               | MMChat_Twitter_Post                          | General          | 5.7K      |
| Multi-image Puzzle (35K)             | Raven                                        | Abstract         | 35K       |
| <b>Multi-frame (Video) Scenarios</b> |                                              |                  |           |
| Video QA(246.9K)                     | NExT-QA                                      | General          | 3.9K      |
|                                      | STAR                                         | General          | 3K        |
|                                      | ShareGPTVideo-VQA                            | General          | 240K      |
| Video Detailed Captioning (15K)      | ShareGPTVideo-Caption                        | General          | 15K       |
| <b>Multi-view (3D) Scenarios</b>     |                                              |                  |           |
| Scene VQA(45.4K)                     | Nuscenes                                     | Outdoor          | 9.8K      |
|                                      | ScanQA                                       | Indoor Realistic | 25.6k     |
|                                      | 3D-LLM-Scene                                 | Indoor Realistic | 10K       |
| Embodied VQA(62.5K)                  | ALFRED                                       | Indoor Synthetic | 22.6K     |
|                                      | 3D-LLM-Dialogue                              | Indoor Realistic | 20K       |
|                                      | 3D-LLM-Planning                              | Indoor Realistic | 19.9K     |
| <b>Single-image Scenarios</b>        |                                              |                  |           |
| Single-image Tasks(307K)             | Randomly sampling 40% SFT data of LLaVA-NeXT | General          | 307K      |

Table 4: LLaVA-Interleave Bench detailed datasets.

| Task                                                    | Dataset                      | Scenario           | # Samples |
|---------------------------------------------------------|------------------------------|--------------------|-----------|
| <b>In-domain Evaluation - Newly Curated Benchmarks</b>  |                              |                    |           |
| Spot the Difference(0.3K)                               | Spot-the-Diff                | Surveillance       | 0.1K      |
|                                                         | Birds-to-Words               | Birds              | 0.1K      |
|                                                         | CLEVR-Change                 | Solids             | 0.1K      |
| Image Edit Instruction(2K)                              | HQ-Edit                      | Sythetic           | 1K        |
|                                                         | MagicBrush                   | Realistic          | 0.9K      |
|                                                         | IEdit                        | Realistic          | 0.1K      |
| Visual Story Telling(0.4K)                              | AESOP                        | Cartoon            | 0.1K      |
|                                                         | FlintstonesSV                | Cartoon            | 0.1K      |
|                                                         | PororoSV                     | Cartoon            | 0.1K      |
|                                                         | VIST                         | Realistic          | 0.1K      |
| Text-rich VQA(0.4K)                                     | WebQA                        | Webpage            | 0.1K      |
|                                                         | TQA                          | Textbook           | 0.1K      |
|                                                         | OCR-VQA                      | OCR                | 0.1K      |
|                                                         | DocVQA                       | Document           | 0.1K      |
| Multi-image VQA(0.4K)                                   | MIT-States_StateCoherence    | General            | 0.1K      |
|                                                         | MIT-States_PropertyCoherence | General            | 0.1K      |
|                                                         | RecipeQA_ImageCoherence      | Recipe             | 0.1K      |
|                                                         | VISION                       | Industrial         | 0.1K      |
| Puzzle (1.4K)                                           | Raven                        | Abstract           | 1.4K      |
| <b>In-domain Evaluation - Existing Benchmarks</b>       |                              |                    |           |
| NLVR2 (7K)                                              | NLVR2                        | Realistic          | 7K        |
| Q-Bench (1K)                                            | Q-Bench                      | Low-level          | 1K        |
| <b>Out-domain Evaluation - Newly Curated Benchmarks</b> |                              |                    |           |
| MathVerse-mv (0.8K)                                     | MathVerse (Vision Dominant)  | Math Diagram       | 0.8K      |
| SciVerse-mv (0.4K)                                      | SciVerse (Vision Dominant)   | Scientific Diagram | 0.4K      |
| <b>Out-domain Evaluation - Existing Benchmarks</b>      |                              |                    |           |
| Mantis-Eval (0.2K)                                      | Mantis-Eval                  | General            | 0.2K      |
| BLINK (1.9K)                                            | BLINK                        | General            | 1.9k      |
| MMMU-mv (test) (0.8K)                                   | MMMU                         | Scientific Diagram | 0.8K      |

C MORE REAL-WORLD APPLICATIONS

Table 5: An example of emerging capability: multi-doc VQA.

| Real-World Applications |                                                                                                                                                                                                                                                                                                                                                                                                                                                                                                                                                                                                                                                                                                                                                                                                                                                                                                                                                                                                                                                                                                                                                                                                                                                                                              |
|-------------------------|----------------------------------------------------------------------------------------------------------------------------------------------------------------------------------------------------------------------------------------------------------------------------------------------------------------------------------------------------------------------------------------------------------------------------------------------------------------------------------------------------------------------------------------------------------------------------------------------------------------------------------------------------------------------------------------------------------------------------------------------------------------------------------------------------------------------------------------------------------------------------------------------------------------------------------------------------------------------------------------------------------------------------------------------------------------------------------------------------------------------------------------------------------------------------------------------------------------------------------------------------------------------------------------------|
|                         |                                                                                                                                                                                                                                                                                                                                                                                                                                                                                                                                                                                                                                                                                                                                                                                                                                                                                                                                                                                                                                                                                                                                                                                                                                                                                              |
| User                    | Hi, there are two candidates, can you provide a brief description for each of them for me?                                                                                                                                                                                                                                                                                                                                                                                                                                                                                                                                                                                                                                                                                                                                                                                                                                                                                                                                                                                                                                                                                                                                                                                                   |
| Ours                    | <p>Certainly! Here's a brief description of each candidate:</p> <ol style="list-style-type: none"> <li><b>Oprah Winfrey:</b> <ul style="list-style-type: none"> <li><b>Professional Experience:</b> Known for her talk show, "The Oprah Winfrey Show," and her work on "COVID-19" as a presenter on Apple TV.</li> <li><b>Skills:</b> Emphasized on emotional intelligence, interpersonal skills, and creativity.</li> <li><b>Honors &amp; Awards:</b> Notable achievements include the Golden Globe Award for Best Television Series and the Golden Globe Award for Best Television Special.</li> </ul> </li> <li><b>Steve Jobs:</b> <ul style="list-style-type: none"> <li><b>Professional Experience:</b> Co-founder of Apple Inc., where he led the development of iconic products like the iMac, iPod, and iPhone.</li> <li><b>Skills:</b> Highlighted as a thinker with a focus on innovation and problem-solving.</li> <li><b>Honors &amp; Awards:</b> Recognized with numerous accolades, including the MacArthur Fellowship and the NeXT Computer Science Award.</li> </ul> </li> </ol> <p>Please note that these descriptions are based on the information provided in the images and do not include any personal details or specific accomplishments mentioned in the images.</p> |
| User                    | Which of them better suits the role of the Congressman of the US? Why?                                                                                                                                                                                                                                                                                                                                                                                                                                                                                                                                                                                                                                                                                                                                                                                                                                                                                                                                                                                                                                                                                                                                                                                                                       |
| Ours                    | <p>The first resume, featuring Oprah Winfrey, would better suit the role of a Congressman because it highlights skills and experiences that are relevant to political office, such as leadership, public speaking, and media experience. These qualities are essential for a politician to effectively represent their constituents and engage in legislative processes. The second resume, while it could be suitable for a creative or entrepreneurial role, does not specifically mention skills or experiences that align with the responsibilities of a Congressman.</p>                                                                                                                                                                                                                                                                                                                                                                                                                                                                                                                                                                                                                                                                                                                |
